# Supplementary material
Source: HighWire-hosted journal article supplement (https://cmaj.ca/highwire/filestream/150996/field_highwire_adjunct_files/0/231250-res-1-at.pdf)
Supplement: 231250-res-1-at.pdf [file 231250-res-1-at.pdf]

**Trans(forming) the Medical Gaze: A Hermeneutic Phenomenology of Transgender Patients' Lived Experiences Accessing Transition-Related Surgery and Their Health Care Interactions**

**Demographic Data**

- 1) Age: \_\_\_\_\_
- 2) Age when came out as gender different than that assigned at birth: \_\_\_\_\_
- 3) Age at beginning of Transition-Related Surgery journey: \_\_\_\_\_
- 4) Is your gender different then the one assigned to you at birth? \_\_\_\_\_
- 5) Gender Identity (please circle all that apply):
  - Transgender
  - Trans man
  - Trans masculine
  - Trans woman
  - Trans feminine
  - Non-Binary
  - Two-Spirit
  - Other: \_\_\_\_\_
- 6) Race: \_\_\_\_\_
- 7) Ethnicity: \_\_\_\_\_
- 8) Province or Territory of Referral: \_\_\_\_\_
- 9) Clinicians / Services / Surgeries Undergone:  
\_\_\_\_\_  
\_\_\_\_\_  
\_\_\_\_\_  
\_\_\_\_\_  
\_\_\_\_\_  
\_\_\_\_\_
- 10) Services / Surgeries Still Hoping to Undergo:  
\_\_\_\_\_

---

---

---
